# Supplementary material
Source: MDPI journal article supplement (https://www.mdpi.com/1911-8074/16/3/210)
Supplement: s1 [file s1]

**Table S1.** The used domains and items in the current study.

| Construct                                 | Variables                                                                           | Source                                      |
|-------------------------------------------|-------------------------------------------------------------------------------------|---------------------------------------------|
| <b>Tourism SM content in Saudi Arabia</b> | Tourism SM content is expressive and attracts my attention.                         | Adapted from (Reichstein & Bruschi, 2019)   |
|                                           | Tourism SM content arouses my curiosity.                                            |                                             |
|                                           | Tourism SM content provides a holistic overview about it.                           |                                             |
|                                           | Tourism SM content offers easy usability.                                           |                                             |
|                                           | Tourism SM content satisfies expectations that arise.                               |                                             |
|                                           | Tourism SM content is faster and more widespread.*                                  |                                             |
| <b>Perceived value</b>                    | The tourism services provided in Saudi Arabia are well organized.                   | Adapted from (Eid & El-Gohary, 2015)        |
|                                           | The tourism services provided in Saudi Arabia are maintained throughout.            |                                             |
|                                           | The tourism services provided in Saudi Arabia have acceptable level of quality.     |                                             |
|                                           | The tourism services provided in Saudi Arabia are reasonably priced.                |                                             |
|                                           | The tourism services provided in Saudi Arabia are well made.*                       |                                             |
| <b>Perceived trust</b>                    | The tourism services provided in Saudi Arabia have integrity.                       | Adapted from (Park, 2020; Kim et al., 2011) |
|                                           | The tourism services provided in Saudi Arabia are reliable.                         |                                             |
|                                           | The tourism services provided in Saudi Arabia are trustworthy.                      |                                             |
|                                           | I can trust the tourism services provided in Saudi Arabia.                          |                                             |
|                                           | I have a good feeling when engaging the tourism services provided in Saudi Arabia.* |                                             |
| <b>Intention to revisit</b>               | I have the intention to visit the tourism attractions in Saudi Arabia.              | Adapted from (An et al., 2021)              |
|                                           | My next trip assigns to the attractions in Saudi Arabia.                            |                                             |
|                                           | I am preparing to visit tourism attractions in Saudi Arabia.                        |                                             |
|                                           | Visiting the tourism attractions in Saudi Arabia is a priority to me.               |                                             |
